# Supplementary material for: A density functional study on cationic AunCum+ clusters and their monocarbonyls
Source: Royal Society of Chemistry journal article supplement (doi:10.1039/b817806b), 2009-01-01
Supplement: b817806b.pdf [file b817806b.pdf]

## Supplementary Information

### A density functional study on cationic $Au_nCu_m^+$ clusters and their monocarbonyls

by Yu Zhao, Zhenyu Li, and Jinlong Yang

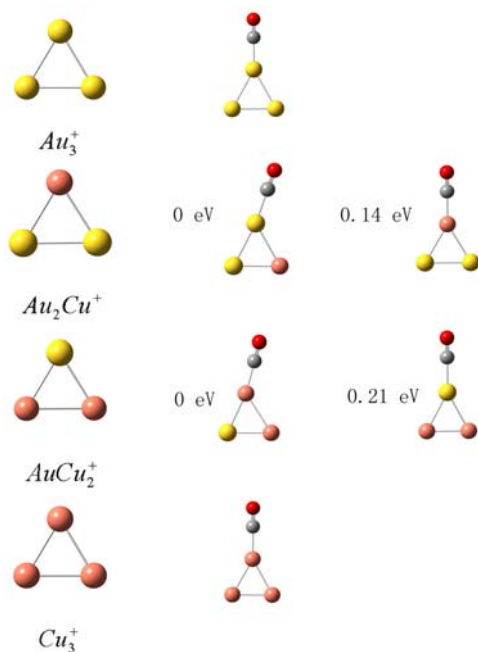

Figure S1. Isomers for  $Au_nCu_m^+$  with  $n+m=3$ .

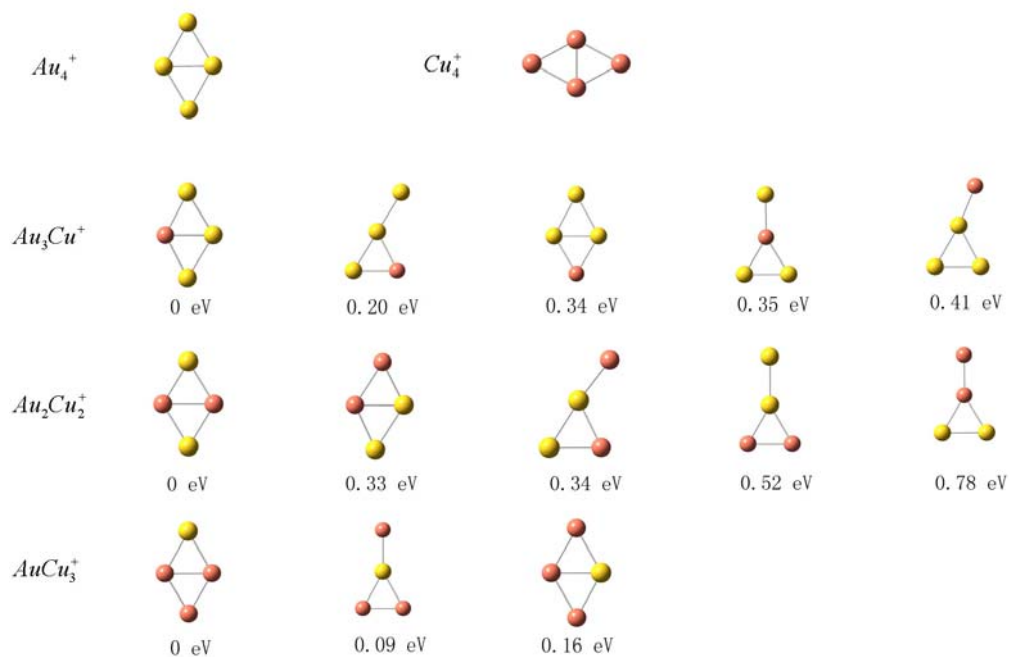

Figure S2. Isomers for  $Au_nCu_m^+$  with  $n+m=4$ .

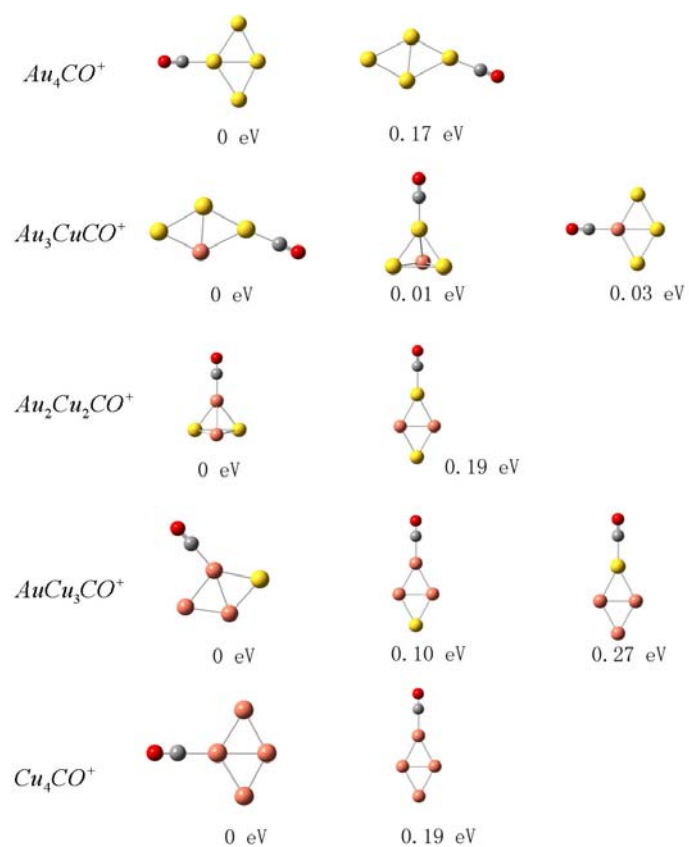

Figure S3. Isomers for  $Au_nCu_mCO^+$  with  $n+m=4$ .

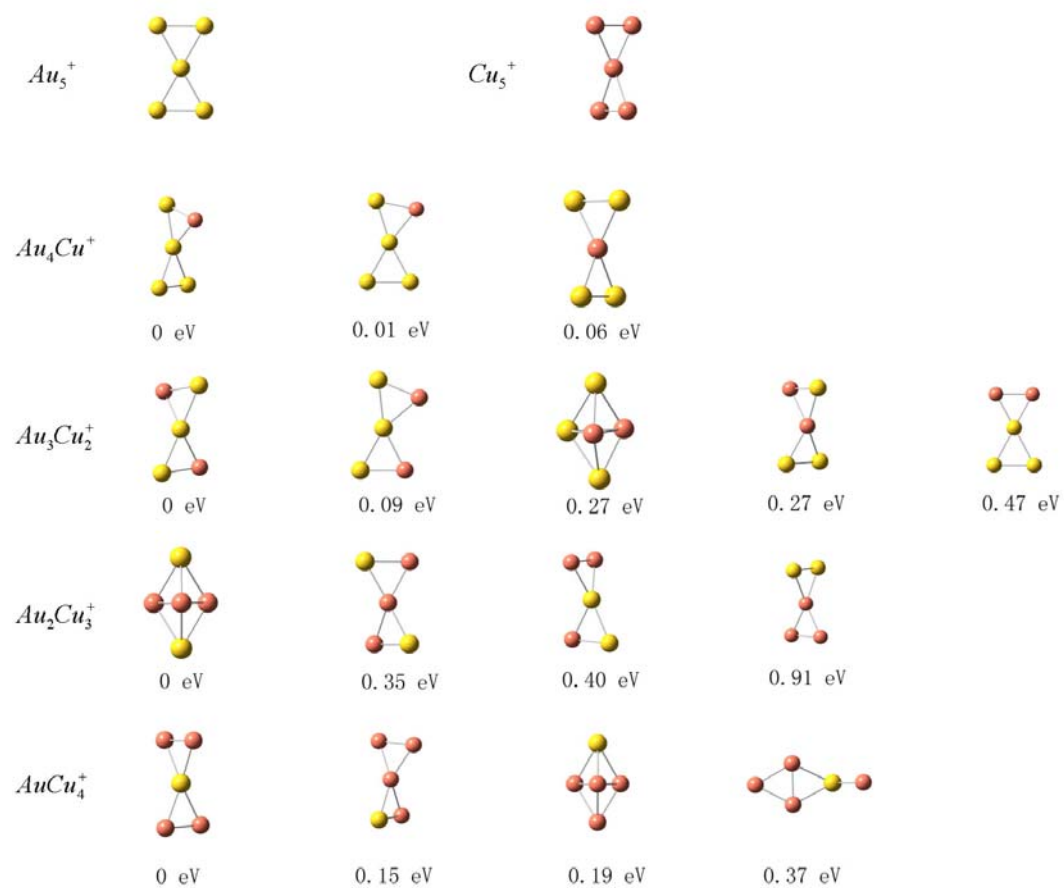

Figure S4. Isomers for  $Au_nCu_m^+$  with  $n+m=5$ .

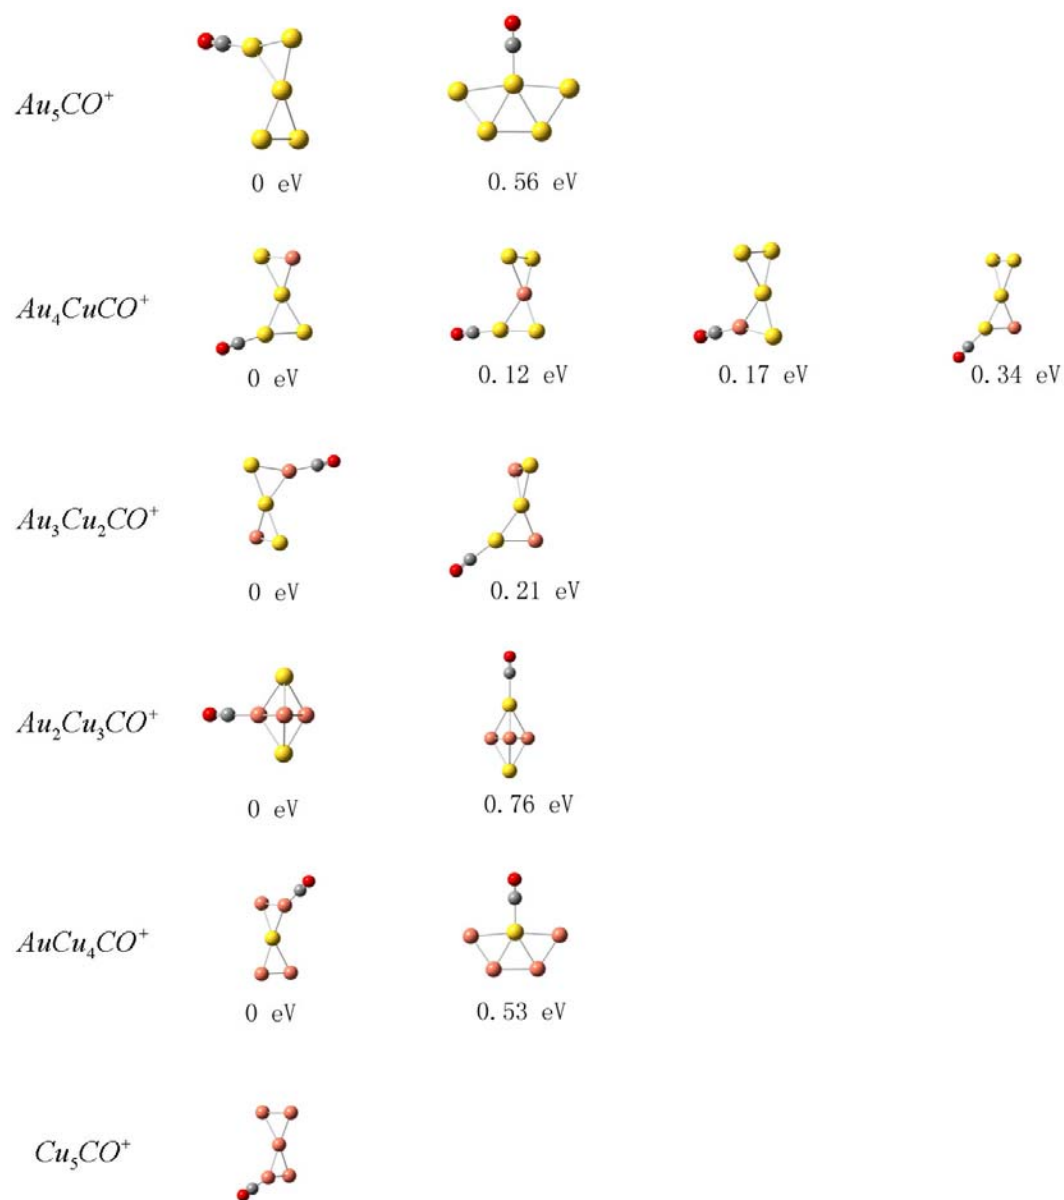

Figure S5. Isomers for  $Au_nCu_mCO^+$  with  $n+m=5$ .

$Au_6^+$

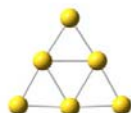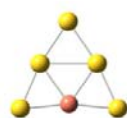

0 eV

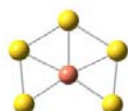

0.003 eV

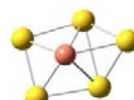

0.01 eV

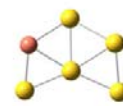

0.06 eV

$Au_5Cu^+$

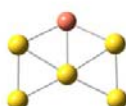

0.06 eV

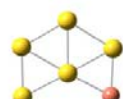

0.13 eV

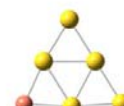

0.25 eV

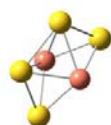

0 eV

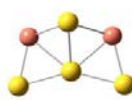

0.28 eV

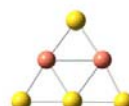

0.30 eV

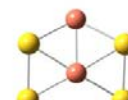

0.34 eV

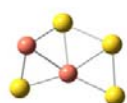

0.35 eV

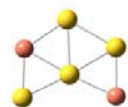

0.36 eV

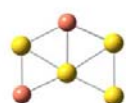

0.37 eV

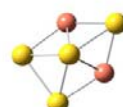

0.41 eV

$Au_4Cu_2^+$

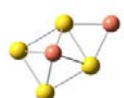

0.43 eV

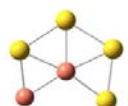

0.46 eV

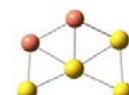

0.53 eV

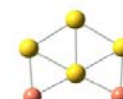

0.55 eV

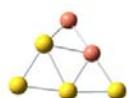

0.59 eV

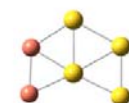

0.72 eV

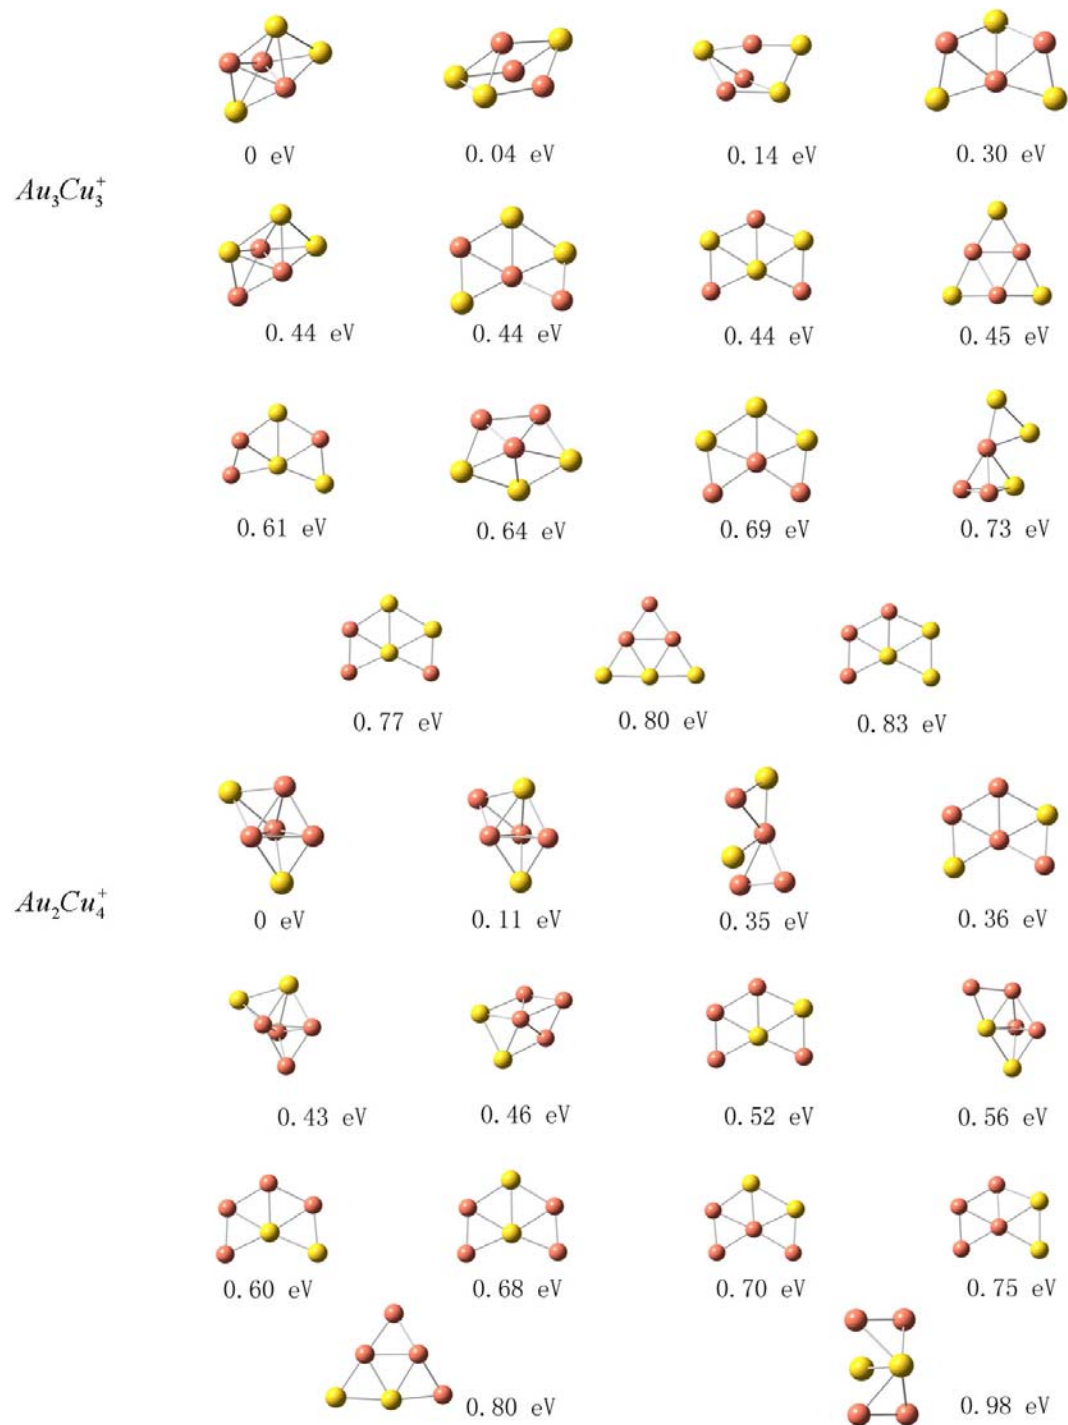

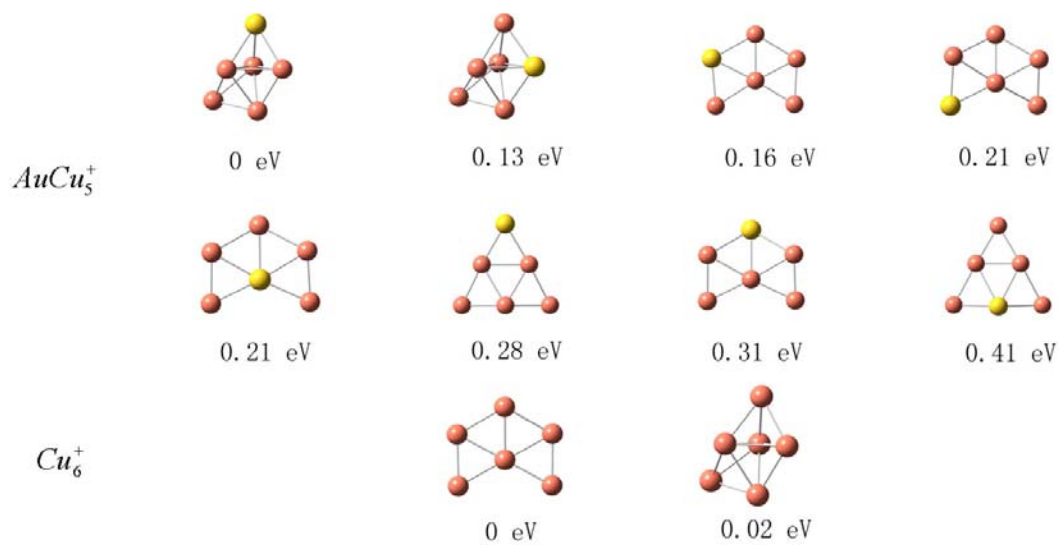

Figure S6. Isomers for  $Au_nCu_m^+$  with  $n+m=6$ .

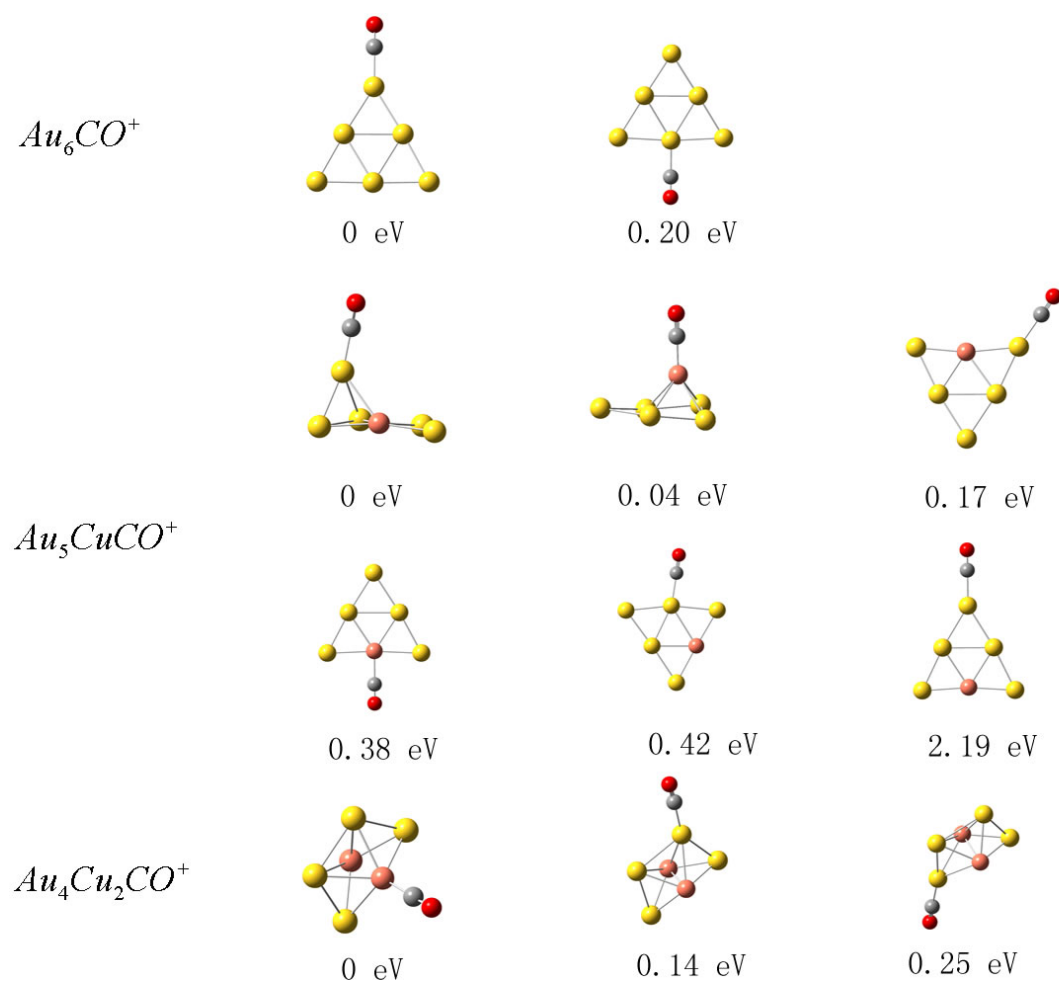

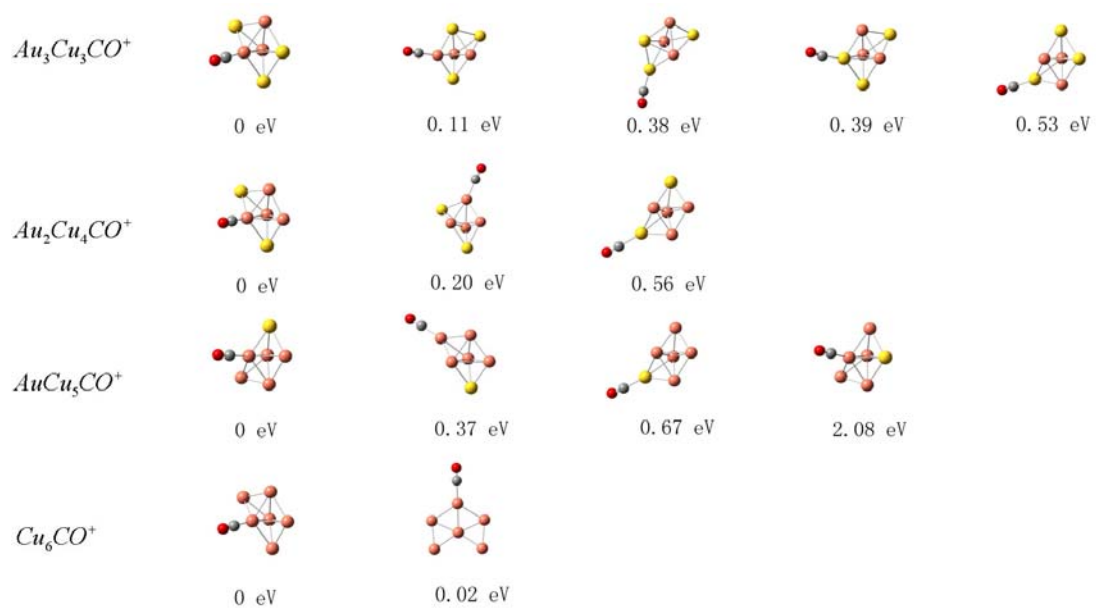

Figure S7. Isomers for  $Au_nCu_mCO^+$  with  $n+m=6$ .



TABLE I: NBO charge on atoms of  $\text{Au}_n\text{Cu}_m^+$  and  $\text{Au}_n\text{Cu}_m\text{CO}^+$  ( $n+m=2$ )

| No.                      | 1          | 2          | 3 (C atom) | 4 (O atom) |
|--------------------------|------------|------------|------------|------------|
| $\text{Au}_2^+$          | 0.500      | 0.500      |            |            |
| $\text{Au}_2\text{CO}^+$ | 0.416      | 0.427      | 0.463      | -0.306     |
| $\text{AuCu}^+$          | (Au) 0.271 | (Cu) 0.729 |            |            |
| $\text{AuCuCO}^+$        | (Au) 0.293 | (Cu) 0.615 | 0.407      | -0.315     |
| $\text{Cu}_2^+$          | 0.500      | 0.500      |            |            |
| $\text{Cu}_2^+$          | 0.437      | 0.486      | 0.399      | -0.322     |

TABLE II: NBO charge on atoms of  $\text{Au}_n\text{Cu}_m^+$  and  $\text{Au}_n\text{Cu}_m\text{CO}^+$  ( $n+m=3$ )

| No.                        | 1           | 2      | 3          | 4 (C atom) | 5 (O atom) |
|----------------------------|-------------|--------|------------|------------|------------|
| $\text{Au}_3^+$            | 0.333       | 0.333  | 0.333      |            |            |
| $\text{Au}_3\text{CO}^+$   | 0.262       | 0.262  | 0.347      | 0.448      | -0.319     |
| $\text{Au}_2\text{Cu}^+$   | 0.205       | 0.205  | (Cu) 0.590 |            |            |
| $\text{Au}_2\text{CuCO}^+$ | 0.285       | 0.002  | (Cu) 0.587 | 0.449      | -0.322     |
| $\text{AuCu}_2^+$          | (Au) -0.016 | 0.508  | 0.508      |            |            |
| $\text{AuCu}_2\text{CO}^+$ | (Au) -0.116 | (0.539 | 0.485      | 0.422      | -0.330     |
| $\text{Cu}_3^+$            | 0.333       | 0.333  | 0.333      |            |            |
| $\text{Cu}_3^+$            | 0.283       | 0.283  | 0.353      | 0.418      | -0.337     |

TABLE III: NBO charge on atoms of  $\text{Au}_n\text{Cu}_m^+$  and  $\text{Au}_n\text{Cu}_m\text{CO}^+$  ( $n+m=4$ )

| No.                                 | 1           | 2          | 3      | 4          | 5 (C atom) | 6 (O atom) |
|-------------------------------------|-------------|------------|--------|------------|------------|------------|
| $\text{Au}_4^+$                     | 0.291       | 0.209      | 0.291  | 0.209      |            |            |
| $\text{Au}_4\text{CO}^+$            | 0.346       | 0.220      | 0.109  | 0.220      | 0.434      | -0.329     |
| $\text{Au}_3\text{Cu}^+$            | 0.203       | 0.137      | 0.137  | (Cu) 0.524 |            |            |
| $\text{Au}_3\text{CuCO}^+$          | 0.050       | 0.042      | 0.260  | (Cu) 0.526 | 0.450      | -0.328     |
| $\text{Au}_2\text{Cu}_2^+$          | 0.062       | (Cu) 0.438 | 0.062  | (Cu) 0.438 |            |            |
| $\text{Au}_2\text{Cu}_2\text{CO}^+$ | -0.093      | (Cu) 0.591 | -0.093 | (Cu) 0.519 | 0.413      | -0.338     |
| $\text{AuCu}_3^+$                   | (Au) -0.020 | 0.355      | 0.355  | 0.311      |            |            |
| $\text{AuCu}_3\text{CO}^+$          | (Au) -0.075 | 0.404      | 0.274  | 0.338      | 0.401      | -0.343     |
| $\text{Cu}_4^+$                     | 0.249       | 0.251      | 0.249  | 0.251      |            |            |
| $\text{Cu}_4^+$                     | 0.120       | 0.267      | 0.294  | 0.267      | 0.393      | -0.340     |

TABLE IV: NBO charge on atoms of  $\text{Au}_n\text{Cu}_m^+$  and  $\text{Au}_n\text{Cu}_m\text{CO}^+$  ( $n+m=5$ )

| No.                                 | 1           | 2          | 3      | 4          | 5           | 6(C atom) | 7(O atom) |
|-------------------------------------|-------------|------------|--------|------------|-------------|-----------|-----------|
| $\text{Au}_5^+$                     | 0.247       | 0.247      | 0.247  | 0.247      | 0.013       |           |           |
| $\text{Au}_5\text{CO}^+$            | 0.232       | 0.234      | 0.049  | 0.357      | 0.024       | 0.446     | -0.341    |
| $\text{Au}_4\text{Cu}^+$            | 0.027       | -0.051     | 0.227  | 0.229      | (Cu) 0.568  |           |           |
| $\text{Au}_4\text{CuCO}^+$          | -0.004      | -0.044     | 0.355  | 0.018      | (Cu) 0.568  | 0.449     | -0.341    |
| $\text{Au}_3\text{Cu}_2^+$          | -0.012      | (Cu) 0.569 | -0.114 | (Cu) 0.569 | -0.012      |           |           |
| $\text{Au}_3\text{Cu}_4\text{CO}^+$ | -0.068      | (Cu) 0.545 | -0.092 | (Cu) 0.567 | -0.026      | 0.419     | -0.345    |
| $\text{Au}_2\text{Cu}_3^+$          | (Au) -0.329 | 0.553      | 0.552  | 0.552      | (Au) -0.329 |           |           |
| $\text{Au}_2\text{Cu}_3\text{CO}^+$ | (Au) -0.316 | 0.539      | 0.539  | 0.494      | (Au) -0.316 | 0.407     | -0.347    |
| $\text{AuCu}_4^+$                   | (Au) -0.310 | 0.328      | 0.328  | 0.328      | 0.328       |           |           |
| $\text{AuCu}_4\text{CO}^+$          | (Au) -0.328 | 0.300      | 0.301  | 0.257      | 0.416       | 0.390     | -0.336    |
| $\text{Cu}_5^+$                     | 0.265       | 0.265      | 0.264  | 0.265      | -0.059      |           |           |
| $\text{Cu}_5\text{CO}^+$            | 0.349       | 0.140      | 0.250  | 0.250      | -0.051      | 0.417     | -0.355    |

| No.                                 | 1           | 2          | 3           | 4               | 5      | 6           | 7(C atom)   | 8(O atom) |
|-------------------------------------|-------------|------------|-------------|-----------------|--------|-------------|-------------|-----------|
| $\text{Au}_6^+$                     | 0.225       | 0.05       | 0.225       | 0.223           | 0.223  | 0.054       |             |           |
| $\text{Au}_6\text{CO}^+$            | 0.325       | 0.068      | 0.086       | 0.065           | 0.240  | 0.091       | 0.456-0.330 |           |
| $\text{Au}_5\text{Cu}^+$            | 0.065       | (Cu)0.500  | 0.066       | 0.057           | 0.057  | 0.255       |             |           |
| $\text{Au}_5\text{CuCO}^+$          | -0.036      | (Cu) 0.417 | 0.280       | 0.154           | -0.074 | 0.139       | 0.452       | -0.331    |
| $\text{Au}_4\text{Cu}_2^+$          | 0.050       | 0.048      | -0.070      | (Cu) 0.522 (Cu) | 0.523  | -0.071      |             |           |
| $\text{Au}_4\text{Cu}_4\text{CO}^+$ | 0.053       | 0.054      | -0.050      | (Cu) 0.476 (Cu) | 0.485  | -0.058      | 0.395       | -0.347    |
| $\text{Au}_3\text{Cu}_3^+$          | (Au) -0.107 | 0.417      | (Au) -0.080 | 0.506           | 0.501  | (Au) -0.237 |             |           |
| $\text{Au}_3\text{Cu}_3\text{CO}^+$ | (Au) -0.095 | 0.423      | (Au) -0.066 | 0.446           | 0.469  | (Au) -0.223 | 0.400       | -0.353    |
| $\text{Au}_2\text{Cu}_4^+$          | 0.245       | 0.245      | (Au) -0.221 | 0.477           | 0.477  | (Au) -0.222 |             |           |
| $\text{Au}_2\text{Cu}_4\text{CO}^+$ | 0.255       | 0.261      | (Au) -0.207 | 0.445           | 0.413  | (Au) -0.207 | 0.396       | -0.356    |
| $\text{AuCu}_5^+$                   | (Au) -0.259 | 0.100      | 0.244       | 0.113           | 0.401  | 0.401       |             |           |
| $\text{AuCu}_5\text{CO}^+$          | (Au) -0.230 | 0.109      | 0.261       | 0.139           | 0.381  | 0.315       | 0.388       | -0.336    |
| $\text{Cu}_6^+$                     | 0.137       | 0.230      | 0.274       | -0.052          | 0.137  | 0.274       |             |           |
| $\text{Cu}_6\text{CO}^+$            | 0.117       | 0.115      | 0.112       | 0.212           | 0.324  | 0.112       | 0.372       | -0.365    |

TABLE V: NBO charge on atoms of  $\text{Au}_n\text{Cu}_m^+$  and  $\text{Au}_n\text{Cu}_m\text{CO}^+$  ( $n+m=6$ )
